# Supplementary material for: Unravelling the truth: Examining the evidence for health-related claims made by naturopathic influencers on social media – a retrospective analysis
Source: PubMed Central journal article supplement (PMC9958238; doi:10.34172/hpp.2022.49), 2022-12-31
Supplement: hpp-12-372-s001.pdf [file hpp-12-372-s001.pdf]

# Unravelling the truth: Examining the evidence for health-related claims made by naturopathic influencers on social media – a retrospective analysis

Van Nguyen<sup>1\*</sup>, Luke Testa<sup>1\*\*</sup>, Andrea L Smith<sup>2</sup>, Louise A. Ellis<sup>1</sup>, Adam G. Dunn<sup>3</sup>, Jeffrey Braithwaite<sup>1</sup>, Mitchell Sarkies<sup>1</sup>

<sup>1</sup>Australian Institute of Health Innovation, Macquarie University, Sydney, NSW, Australia

<sup>2</sup>The Daffodil Centre, University of Sydney, Sydney, NSW, Australia

<sup>3</sup>Biomedical Informatics and Digital Health, Faculty of Medicine and Health, The University of Sydney, Sydney, NSW, Australia

## Supplementary File 1. NHMRC Levels of Evidence for Intervention Studies

| Level of Evidence | Type of Study Design                                                                                                                                                                                                                         |
|-------------------|----------------------------------------------------------------------------------------------------------------------------------------------------------------------------------------------------------------------------------------------|
| I                 | A systematic review of Level II studies                                                                                                                                                                                                      |
| II                | A randomised controlled trial                                                                                                                                                                                                                |
| III-I             | A pseudorandomised controlled trial (i.e., alternate allocation of some other method)                                                                                                                                                        |
| III-2             | A comparative study with concurrent controls: <ul style="list-style-type: none"><li>• Non-randomised experimental trial</li><li>• Cohort study</li><li>• Case-control study</li><li>• Interrupted time series with a control group</li></ul> |
| III-3             | A comparative study without concurrent controls: <ul style="list-style-type: none"><li>• Historical control study</li></ul>                                                                                                                  |

- Two or more single arm study
- Interrupted time series without a parallel control group

IV

Case studies with either post-test or pre-test/post-test outcomes

---
